# Supplementary figures and images for: SUMO-Activating Enzyme Subunit 1 (SAE1) is A Promising Diagnostic Cancer Metabolism Biomarker of Hepatocellular Carcinoma
Source: Research Square preprint supplement (doi:10.21203/rs.3.rs-106307/v1), 2020-11-18

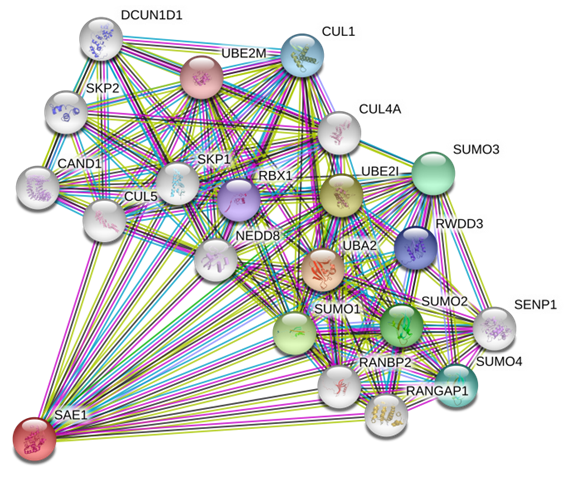


**Pictorial Abstract**

Supplement: Supplementary file 1 [file 90d6d5035a44d29576f56125.docx]
